# Supplementary material for: The Contributions of Soil Fauna to the Accumulation of Humic Substances during Litter Humification in Cold Forests
Source: MDPI journal article supplement (doi:10.3390/f13081235), 2022-08-04
Supplement: s1 [file s1]

**Supplementary table S1. The average densities and eating patterns of soil fauna in the four studied litters under different stages.**

| Species | Soil fauna group           |                     | OF   | DF   | TS    | GS    | LF     | Eating patterns |
|---------|----------------------------|---------------------|------|------|-------|-------|--------|-----------------|
| Birch   | <b>Collembola</b>          | Isotomidae          | 1.67 | 5.00 | 16.00 | 17.00 | 10.00  | Pr              |
|         |                            | <b>Campodeoidea</b> | 0.00 | 0.00 | 0.00  | 0.00  | 0.33   | O               |
|         | Prostigmata                |                     | 0.33 | 0.33 | 0.67  | 5.33  | 22.33  | S               |
|         |                            | Scutacaridae        | 0.00 | 0.00 | 0.00  | 0.00  | 0.33   | S               |
|         | Oribatida                  |                     | 0.00 | 1.33 | 2.67  | 4.67  | 79.67  | S               |
|         |                            | Macropylina         | 0.00 | 0.00 | 0.00  | 8.33  | 0.00   | S               |
|         | <b>Pseudoscorpioniones</b> | Chernetidae         | 0.33 | 0.00 | 0.00  | 0.00  | 0.00   | Pr              |
|         | Coleoptera                 | Carabidae           | 0.00 | 0.00 | 0.00  | 6.67  | 0.00   | Ph              |
|         |                            | Staphylinidae       | 0.00 | 0.00 | 0.00  | 0.00  | 0.33   | S               |
|         |                            | Scydmaenidae        | 0.00 | 0.00 | 0.00  | 0.00  | 0.33   | Pr              |
|         | Diptera                    | Phoridae            | 0.00 | 0.00 | 0.00  | 0.00  | 0.33   | S               |
|         | Isoptera                   | Kalotermitidae      | 0.00 | 0.00 | 0.00  | 0.33  | 0.00   | Ph              |
|         | Isopoda                    | Armadillidiidae     | 0.00 | 0.00 | 0.00  | 0.33  | 0.00   | O               |
|         | <b>Symphylla</b>           | Scolopendrellidae   | 0.00 | 0.00 | 0.00  | 0.67  | 0.00   | S               |
|         | Diplopoda                  | Hirudisomatidae     | 0.00 | 0.00 | 0.00  | 0.33  | 0.00   | Ph              |
|         | Lithobiomorpha             |                     | 0.00 | 0.00 | 0.00  | 0.33  | 0.33   | Pr              |
|         | Geophilomorpha             |                     | 0.00 | 0.00 | 0.00  | 0.00  | 0.33   | Pr              |
|         | Nematoda                   |                     | 0.00 | 0.00 | 0.00  | 0.00  | 0.33   | O               |
| Fir     | <b>Collembola</b>          | Isotomidae          | 2.00 | 3.00 | 2.33  | 16.67 | 37.00  | Pr              |
|         |                            | Poduridae           | 0.00 | 0.00 | 0.00  | 2.00  | 0.00   | O               |
|         | Prostigmata                |                     | 0.00 | 0.33 | 0.67  | 13.00 | 25.00  | S               |
|         | Oribatida                  |                     | 2.00 | 1.00 | 1.67  | 15.00 | 14.33  | S               |
|         | Isoptera                   | Kalotermitidae      | 0.00 | 0.00 | 0.00  | 0.33  | 0.00   | Ph              |
|         | Coleoptera                 | Carabidae           | 0.00 | 0.00 | 0.00  | 0.33  | 0.00   | Ph              |
|         |                            | Scydmaenidae        | 0.00 | 0.00 | 0.00  | 0.00  | 0.67   | Pr              |
|         |                            | Staphylinidae       | 0.00 | 0.00 | 0.00  | 0.00  | 1.00   | S               |
|         | Diptera                    | Phoridae            | 0.00 | 0.00 | 0.00  | 0.00  | 0.33   | S               |
|         | <b>Pseudoscorpioniones</b> | Cheliferidae        | 0.00 | 0.00 | 0.00  | 0.33  | 0.00   | Pr              |
|         | Geophilomorpha             |                     | 0.00 | 0.00 | 0.00  | 0.00  | 0.67   | Pr              |
|         | Lithobiomorpha             |                     | 0.00 | 0.00 | 0.00  | 0.00  | 1.33   | Pr              |
|         | Isopoda                    | Armadillidiidae     | 0.00 | 0.00 | 0.00  | 0.00  | 0.67   | O               |
|         | Nematoda                   |                     | 0.00 | 0.00 | 0.00  | 0.00  | 0.67   | O               |
|         | Acerentomata               |                     | 0.00 | 0.00 | 0.00  | 0.00  | 1.00   | S               |
| Willow  | <b>Collembola</b>          | Isotomidae          | 2.67 | 0.00 | 4.33  | 70.00 | 104.00 | Pr              |
|         |                            | Poduridae           | 0.00 | 0.00 | 0.00  | 0.33  | 0.00   | O               |
|         |                            | Sminthuridae        | 0.00 | 0.00 | 0.00  | 0.00  | 0.33   | Ph              |
|         | Prostigmata                |                     | 0.00 | 0.00 | 0.33  | 3.00  | 20.33  | S               |
|         |                            | Scutacaridae        | 0.00 | 0.00 | 0.00  | 3.00  | 0.00   | S               |
|         | Oribatida                  |                     | 0.00 | 0.00 | 0.00  | 2.67  | 4.67   | S               |
|         |                            | Macropylina         | 0.00 | 0.00 | 0.00  | 6.67  | 0.00   | S               |
|         | Acariformes                | Tarsonemidae        | 0.00 | 0.00 | 0.00  | 0.33  | 0.00   | O               |

Supplementary table S1 (continued)

| Species   | Soil fauna group  |                   | OF   | DF   | TS   | GS    | LF    | Eating patterns |
|-----------|-------------------|-------------------|------|------|------|-------|-------|-----------------|
| Cypress   | Diptera           | Syrphidae         | 0.00 | 0.00 | 0.00 | 0.67  | 0.00  | S               |
|           | Diptera           | Mycetophilidae    | 0.00 | 0.00 | 0.00 | 1.00  | 0.00  | S               |
|           | Coleoptera        | Staphylinidae     | 0.00 | 0.00 | 0.00 | 0.00  | 1.67  | S               |
|           | Araneae           | Theraphosidae     | 0.33 | 0.00 | 0.00 | 0.00  | 0.00  | Pr              |
|           | Symphyla          | Scolopendrellidae | 0.00 | 0.00 | 0.00 | 0.33  | 0.00  | S               |
|           | Diplopoda         | Hirudisomatidae   | 0.00 | 0.00 | 0.00 | 0.33  | 0.00  | Ph              |
|           | Collembola        | Isotomidae        | 0.00 | 2.00 | 1.00 | 2.67  | 28.33 | Pr              |
|           |                   | Entomobryidae     | 0.00 | 0.00 | 0.00 | 0.00  | 1.00  | Ph              |
|           |                   | Poduridae         | 0.00 | 0.00 | 0.00 | 0.33  | 0.00  | O               |
|           | Oribatida         |                   | 4.67 | 0.00 | 2.33 | 17.67 | 2.33  | S               |
|           |                   | Macropylina       | 0.00 | 0.00 | 0.00 | 12.67 | 0.00  | S               |
|           | Prostigmata       |                   | 1.67 | 0.00 | 2.00 | 4.33  | 23.00 | S               |
|           | Mesostigmata      |                   | 0.00 | 0.33 | 0.00 | 0.00  | 0.00  | S               |
|           | Coleoptera        | Carabidae         | 0.00 | 0.00 | 0.00 | 1.00  | 0.00  | Ph              |
|           | Diptera           | Phoridae          | 0.00 | 0.00 | 0.00 | 0.00  | 1.33  | S               |
|           |                   | Mycetophilidae    | 0.00 | 0.00 | 0.00 | 0.00  | 0.33  | S               |
| Symphyla  | Scolopendrellidae | 0.00              | 0.00 | 0.00 | 0.33 | 0.00  | S     |                 |
| Diplopoda | Hirudisomatidae   | 0.00              | 0.00 | 0.00 | 0.33 | 0.00  | Ph    |                 |
| Nematoda  |                   | 0.00              | 0.00 | 0.00 | 0.00 | 1.33  | O     |                 |

OF: onset of freezing stage, DF: deep freezing stage, TS: thawing stage, GS: growing season, LF: leaf falling stage; S: Saprophagy; Pr: Predatism; Ph: Phytophagy; O: Omnivory.
